# Supplementary material for: Fabrication and characterization of multi-metal co-doped titania films for a water-splitting reaction
Source: Royal Society of Chemistry journal article supplement (doi:10.1039/c0dt00448k), 2010-01-01
Supplement: c0dt00448k.pdf [file c0dt00448k.pdf]

## Supporting information

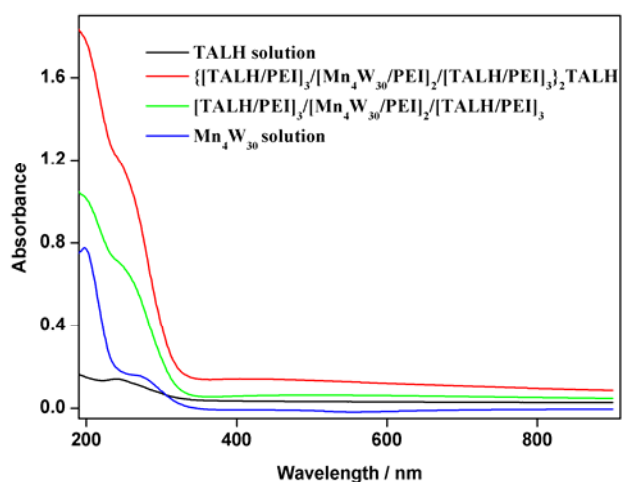

Fig. 1 UV spectrum of TALH solution, Mn<sub>4</sub>W<sub>30</sub> solution, [TALH/PEI]<sub>3</sub>/[Mn<sub>4</sub>W<sub>30</sub>/PEI]<sub>2</sub>/[TALH/PEI]<sub>3</sub> films and {[TALH/PEI]<sub>3</sub>/[Mn<sub>4</sub>W<sub>30</sub>/PEI]<sub>2</sub>/[TALH/PEI]<sub>3</sub>}<sub>2</sub>TALH films.

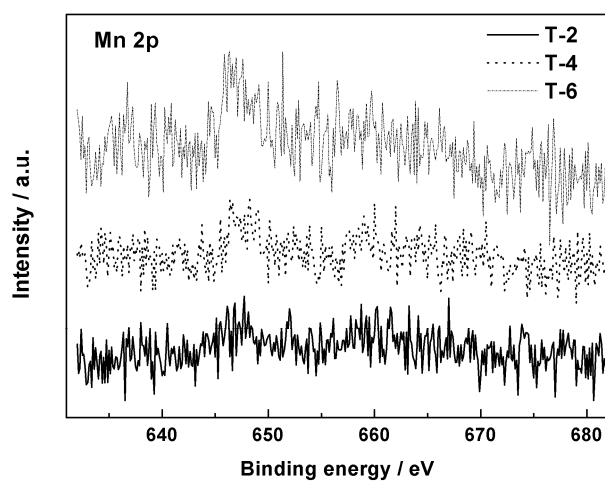

Fig. 2 XPS spectrums of Mn 2p in TiO<sub>2</sub> films.
